# Supplementary material for: Our unknown neighbor: A new species of rain frog of the genus Pristimantis (Amphibia: Anura: Strabomantidae) from the city of Loja, southern Ecuador
Source: PLOS journal article supplement (doi:10.1371/journal.pone.0258454), 2021-10-27
Supplement: S2 (10.1371/journal.pone.0258454.s002) [file journal.pone.0258454.s002]

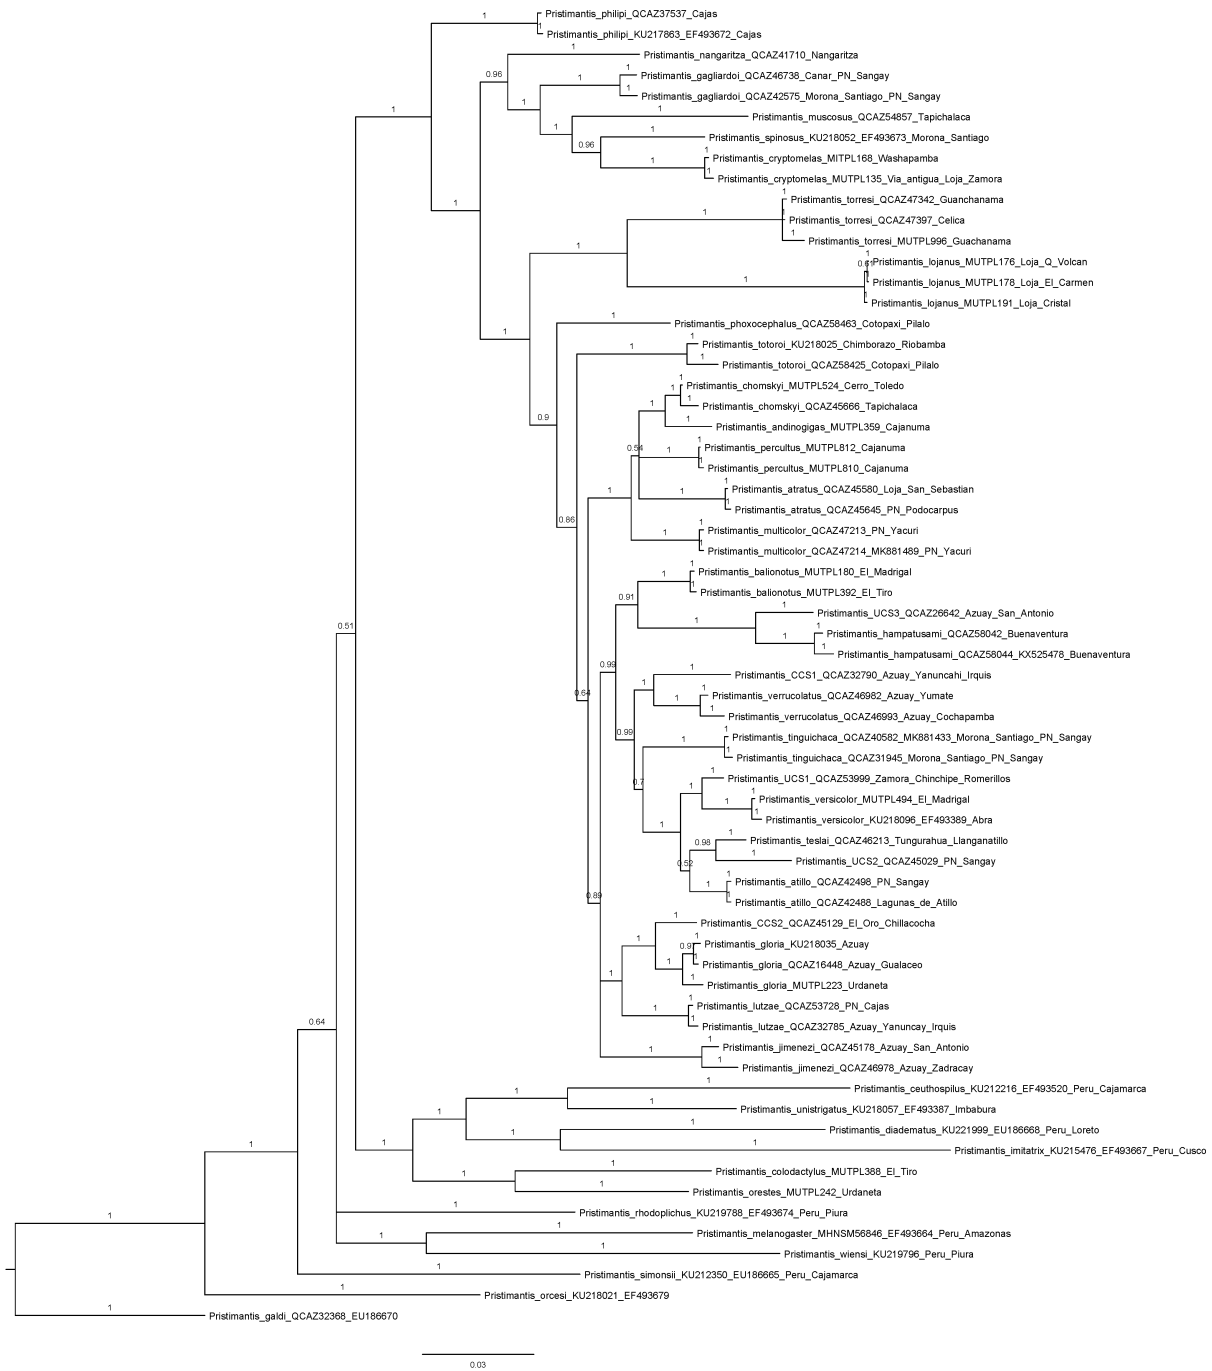

**S2 Fig.** Bayesian phylogram including outgroup, based on 2339 base pairs of concatenated DNA from 12S, 16S, and RAG-1 gene fragments.
