# Supplementary material for: Our unknown neighbor: A new species of rain frog of the genus Pristimantis (Amphibia: Anura: Strabomantidae) from the city of Loja, southern Ecuador
Source: PLoS One. 2021 Oct 27;16(10):e0258454. doi: 10.1371/journal.pone.0258454 (PMC8550592; doi:10.1371/journal.pone.0258454)
Supplement: S3 Table — Values are given as average ± SD (range) and n measured parameter. (XLSX) [file pone.0258454.s005.xlsx]

## Sheet: P. lojanus
Audio file name	Fonoteca UTPL	Voucher	Locality	Coordinates	Altitude (m)	Date	Time	Recording distance	Air temperature (°C)	Air humidity (%)	Single note call duration (s)	Double note call duration (s)	Multi note call duration (s)	Inter–call interval (s)	Call rate (calls/min)	Short note duration for multi note calls (s)	Inter-note interval for multi note calls (s)	Short note rate (notes/s)	Dominant frequency (Hz)	Freq 5% (Hz)	Freq 95% (Hz)	Number of visible harmonics
P. sp 2015 - 02	FUTPL-A 247	no	Loja city, Parque Universitario de Educación Ambiental y Recreación “Francisco Vivar Castro” (PUEAR)	4.0380° S, 79.1901° W	2371	2015.04.08	19:34:00	40 cm	14	no	0.354 ± 0.017 (0.315–0.397) n = 15	N/A	N/A	6.487 ± 1.116 (4.563–9.012) n = 14	8.75931	N/A	N/A	N/A	2652.9 ± 35.662 (2584.0–2670.1) n = 15	2543.8 ± 44.478 (2497.9–2584.0) n = 15	2727.5 ± 42.029 (2670.1–2756.3) n = 15	3–5
LS110439	FUTPL-A 248	no	Loja city, Parque Universitario de Educación Ambiental y Recreación “Francisco Vivar Castro” (PUEAR)	4.0383° S, 79.1903° W	2360	2016.11.30	20:25:00	1 m	14.5	82	0.334 ± 0.014 (0.314–0.357) n = 12	N/A	N/A	7.591 ± 1.217 (5.562–9.351) n = 10	7.74256	N/A	N/A	N/A	2806.5 ± 44.352 (2756.3–2842.4) n = 12	2698.8 ± 42.409 (2670.1–2756.3) n = 12	2871.1 ± 42.409 (2842.4–2928.5) n = 12	5–6
LS110763	FUTPL-A 249	no	Abra de Zamora	3.9865° S, 79.1542° W	2396	2018.10.27	20:21:00	1 m	13.5	76.5	0.367 ± 0.016 (0.344–0.390) n = 21	0.823 ± 0.026 (0.797–0.850) n = 4	1.59613	6.584 ± 1.064 (5.144–9.283) n = 19	7.42507	0.080 ± 0.012 (0.066–0.096) n = 5	0.174 ± 0.014 (0.153–0.185) n = 5	3.94473	2325.6 n = 24	2239.5 n = 24	2411.7 n = 24	3–6
LS111012	FUTPL-A 250	MUTPL 936	Sacama	3.8993° S, 79.1542° W	2572	2020.10.16	20:36:00	1.5 m	12	89.5	0.385 ± 0.010 (0.367–0.401) n = 23	0.911 ± 0.017 (0.895–0.927) n = 4	N/A	7.206 ± 0.675 (6.156–8.233) n = 23	7.57059	N/A	N/A	N/A	2411.7 n = 27	2325.6 n = 27	2497.9 n = 27	3–8
LS111102	FUTPL-A 251	no	Loja city, Cerro Chiriaco	4.0312° S, 79.2402° W	2732	2021.02.26	19:26:00	2 m	13.5	84	0.365 ± 0.014 (0.343–0.385) n = 14	N/A	N/A	6.652 ± 1.487 (4.131–9.231) n = 14	8.08596	N/A	N/A	N/A	2756.3 n = 18	2670.1 n = 18	2842.4 n = 18	4
LS111103	FUTPL-A 252	no	Loja city, Cerro Chiriaco	4.0312° S, 79.2402° W	2732	2021.02.26	19:33:00	1.5 m	13	84	0.371 ± 0.013 (0.345–0.396) n = 19	0.9757	N/A	7.596 ± 1.404 (5.016–9.851) n = 15	7.51623	N/A	N/A	N/A	2819.9 ± 38.672 (2756.3–2842.4) n = 23	2745.0 ± 29.660 (2670.1–2756.3) n = 23	2879.8 ± 43.658 (2842.4–2928.5) n = 23	4–8
210226_0733	FUTPL-A 253	MUTPL 1030	Loja city, Cerro Chiriaco	4.0312° S, 79.2402° W	2732	2021.02.26	20:59:00	1 m	15	84	0.429 ± 0.012 (0.421–0.443) n = 3	1.46003	N/A	7.353 ± 0.415 (6.982–7.801) n = 3	7.51623	N/A	N/A	N/A	2756.3 n = 4	2584.0 n = 4	2756.3 n = 4	4–8
										Total	0.367 ± 0.023 (0.314–0.443) n = 107	0.937 ± 0.192 (0.797–1.460) n = 10	1.59613	7.007 ± 1.182 (4.131–9.851) n = 98	7.80 ± 0.476 (7.43–8.76) n = 7	0.080 ± 0.012 (0.066–0.096) n = 5	0.174 ± 0.014 (0.153–0.185) n = 5	3.94473	2598.0 ± 201.660 (2325.6–2842.4) n = 123	2506.3 ± 200.159 (2239.5–2756.3) n = 123	2674.3 ± 193.183 (2411.7–2928.5) n = 123	3–8

## Sheet: P. torresi
Audio file name	Fonoteca UTPL	Voucher	Locality	Coordinates	Altitude (m)	Date	Time	Recording distance	Air temperature (°C)	Air humidity (%)	Single note call duration (s)	Multi note call duration (s)	Inter–call interval (s)	Call rate (calls/min)	Short note duration for multi note calls (s)	Inter-note interval for multi note calls (s)	Short note rate (notes/s)	Dominant frequency (Hz)	Freq 5% (Hz)	Freq 95% (Hz)	Number of visible harmonics
LS111042	FUTPL-A 254	no	Guachanamá, El Apretadero	4.0511° S, 79.8691° W	2713	2020.12.05	19:46:00	2 m	13.5	86	0.286 ± 0.020 (0.256–0.364) n = 28	N/A	6.431 ± 0.726 (5.181–8.165) n = 24	8.50752	N/A	N/A	N/A	2411.7 n = 23	2325.6 n = 23	2584.0 n = 23	4–5
201205_0022	FUTPL-A 255	no	Guachanamá, El Apretadero	4.0511° S, 79.8691° W	2713	2020.12.05	18:42:00	50 cm	16	74	0.243 ± 0.019 (0.208–0.284) n = 28	N/A	4.571 ± 0.980 (3.318–7.798) n = 24	13.0871	N/A	N/A	N/A	2356.9 ± 70.825 (2153.3–2411.7) n = 33	2273.4 ± 80.395 (2067.2–2325.6) n = 33	2482.2 ± 81.867 (2325.6–2584.0) n = 33	3–6
LS111039, LS111041	FUTPL-A 256, 257	MUTPL 996	Guachanamá, El Apretadero	4.0523° S, 79.8682° W	2713	2020.12.05	18:41; 19:18	1.5 m; 1 m	16; 14.5	73.5; 82.5	0.204 ± 0.029 (0.103–0.267) n = 104	0.189 ± 0.026 (0.153–0.237) n = 14	5.422 ± 0.760 (4.143–6.911) n = 51	10.1169	0.046 ± 0.009 (0.021–0.060) n = 97	0.217 ± 0.018 (0.194–0.288) n = 97	3.78 ± 0.124 (3.60–4.04) n = 16	2477.4 ± 87.909 (2325.6–2584.0) n = 143	2394.3 ± 90.024 (2239.5–2497.9) n = 143	2607.5 ± 83.785 (2497.9–2756.3) n = 143	3–6
201205_0023	FUTPL-A 258	MUTPL 998	Guachanamá, El Apretadero	4.0517° S, 79.8687° W	2711	2020.12.05	19:24:00	1 m	14	83.5	0.260 ± 0.006 (0.249–0.272) n = 23	N/A	4.923 ± 0.584 (3.878–6.065) n = 20	12.0312	N/A	N/A	N/A	2411.7 n = 22	2325.6 n = 23	2497.9 n = 19	4–6
										Total	0.229 ± 0.040 (0.103–0.364) n = 183	0.189 ± 0.026 (0.153–0.237) n = 14	5.370 ± 0.992 (3.318–8.165) n = 119	10.94 ± 2.033 (8.51–13.09) n = 4	0.046 ± 0.009 (0.021–0.060) n = 97	0.217 ± 0.018 (0.194–0.288) n = 97	3.78 ± 0.124 (3.60–4.04) n = 16	2446.0 ± 88.252 (2153.3–2584.0) n = 221	2362.1 ± 90.911 (2067.2–2497.9) n = 222	2576.5 ± 90.080 (2325.9–2756.3) n = 218	3–6
